# Supplementary material for: Catalytic alcoholysis of urea to diethyl carbonate over calcined Mg–Zn–Al hydrotalcite
Source: Royal Society of Chemistry journal article supplement (doi:10.1039/c4ra15897k), 2015-01-01
Supplement: c4ra15897k1.pdf [file c4ra15897k1.pdf]

Cite this: DOI: 10.1039/c0xx00000x

ARTICLE TYPE

www.rsc.org/xxxxxx

## Catalytic alcoholysis of urea to diethyl carbonate over calcined Mg–Zn–Al hydrotalcite

Peixue Wang,<sup>a,b</sup> Shimin Liu,<sup>a</sup> Feng Zhou,<sup>a,b</sup> Benqun Yang,<sup>a,b</sup> Ahmad S. Alshammari,<sup>c</sup> and Youquan Deng,<sup>\*a</sup>

5 Received (in XXX, XXX) Xth XXXXXXXXXX 20XX, Accepted Xth XXXXXXXXXX 20XX

DOI: 10.1039/b000000x

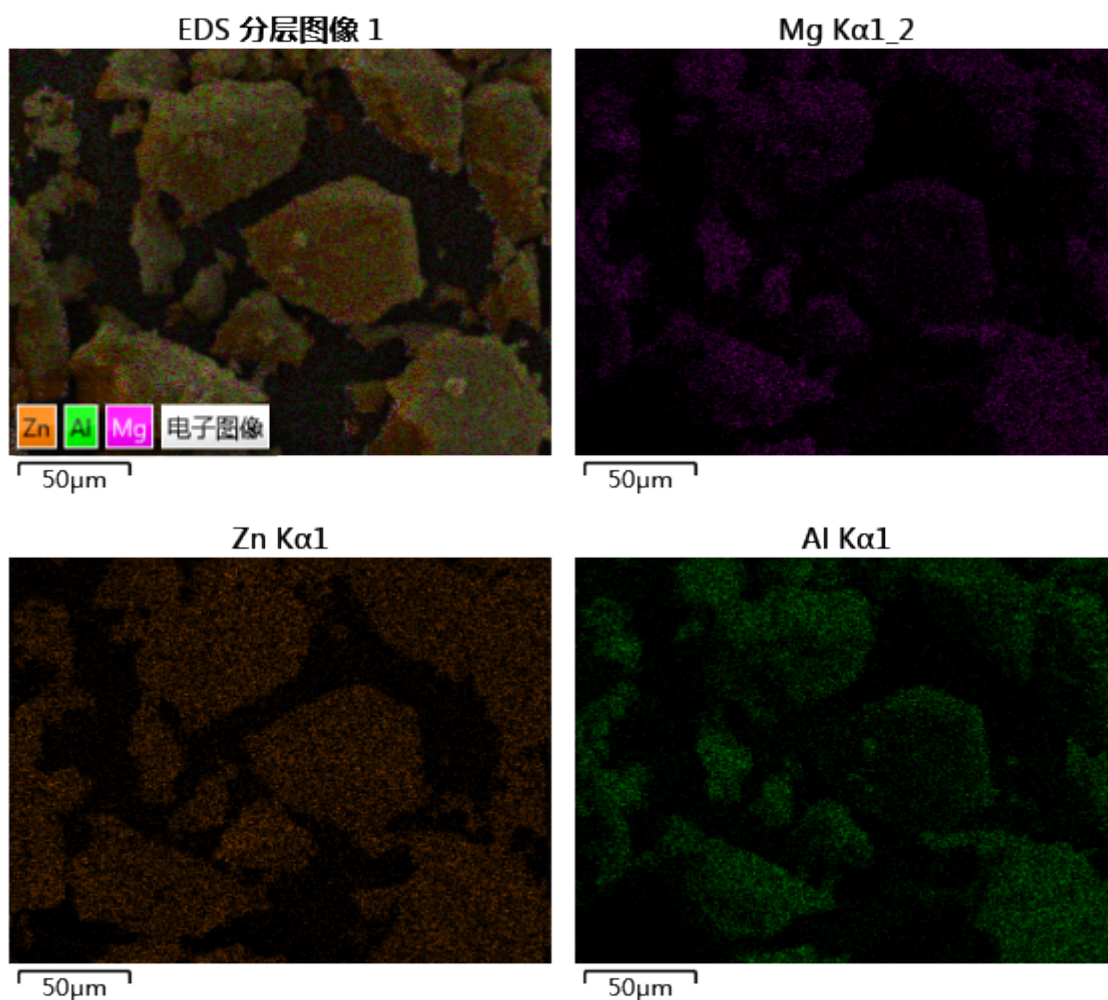

10

Fig. S1. The EDS mapping of MgZn<sub>1.7</sub>Al-450

Cite this: DOI: 10.1039/c0xx00000x

ARTICLE TYPE

www.rsc.org/xxxxxx

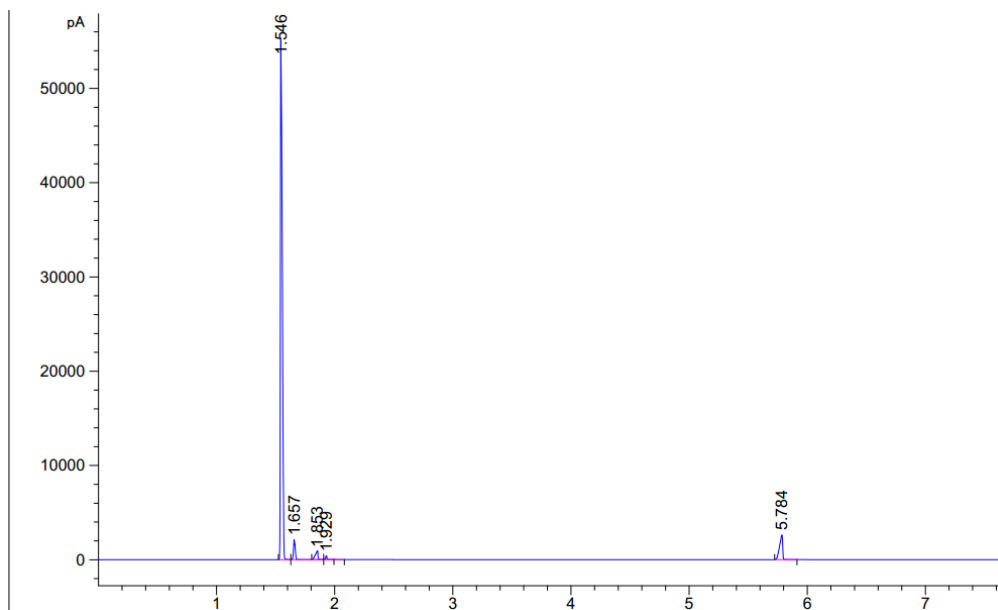

Fig. S2 The GC chromatograms for the synthesis of DMC. CH<sub>3</sub>OH (1.54min ), DMC(1.65min), MC(1.85min), NMMC (1.92min), biphenyl (internal standard, 5.78min).

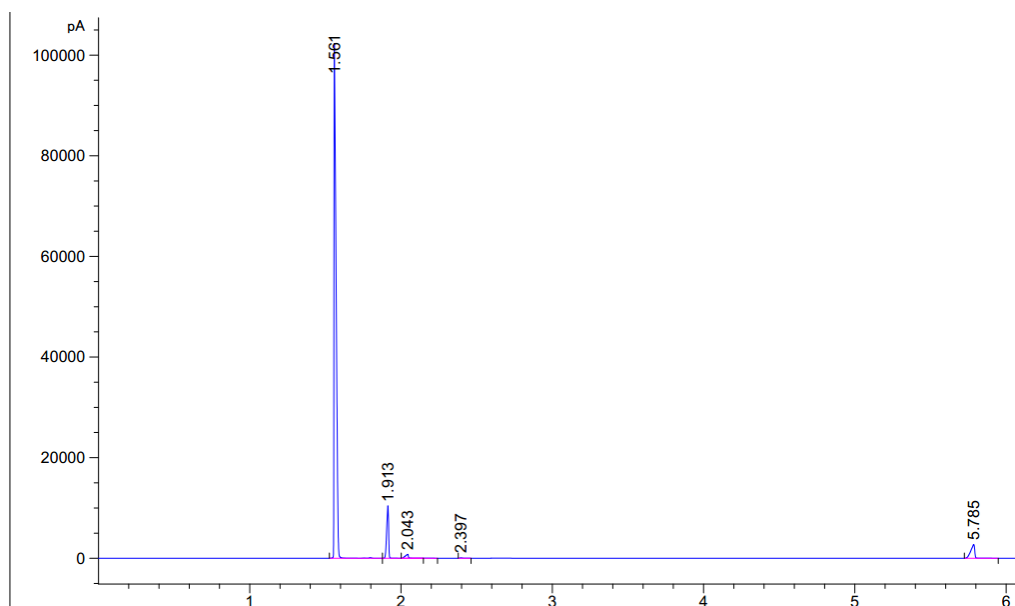

5

Fig. S3 The GC chromatograms for the synthesis of DEC. C<sub>2</sub>H<sub>5</sub>OH (1.56min ), DEC(1.91min), EC(2.0min), NEEC (2.39min), biphenyl (internal standard, 5.78min).

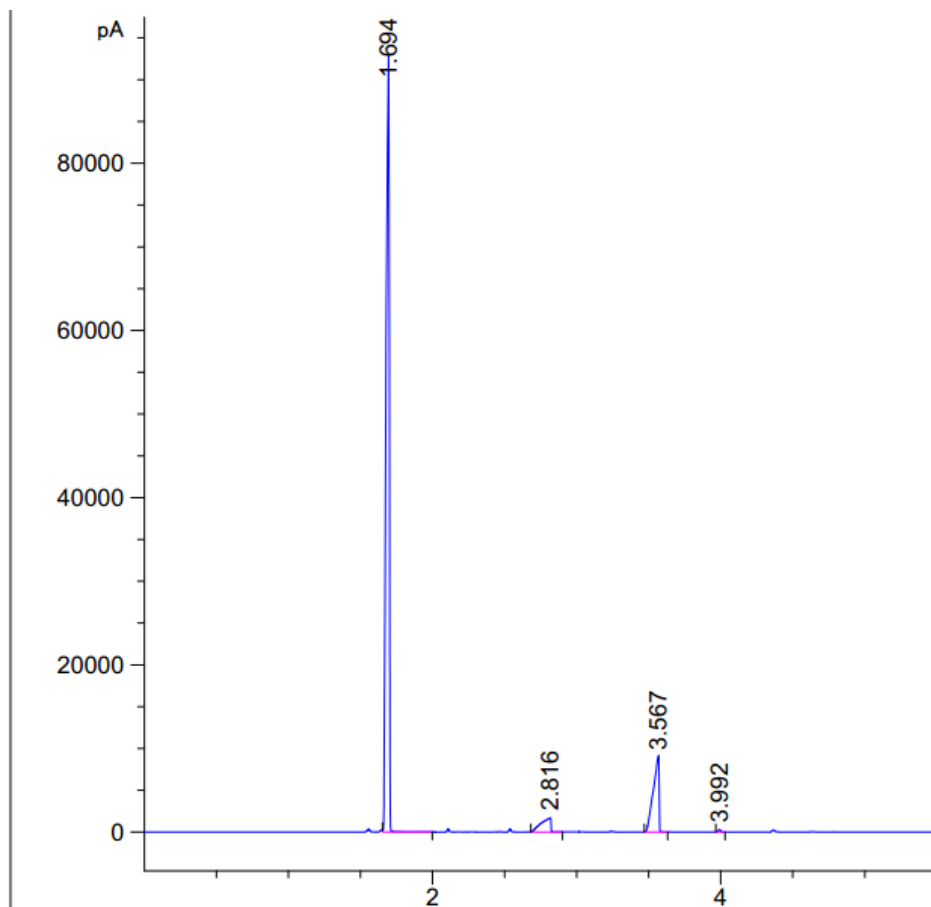

Fig. S4 The GC chromatograms for the synthesis of DBC.  $C_4H_9OH$  (1.69min ), BC(2.81min), DBC(3.56min), NBBC (3.99min), biphenyl (internal standard, 5.78min).
